# Supplementary material for: Virulence of Marburg Virus Angola Compared to Mt. Elgon (Musoke) in Macaques: A Pooled Survival Analysis
Source: PubMed Central journal article supplement (PMC6267608; doi:10.3390/v10110658), 2018-11-21
Supplement: viruses-10-00658-s001.pdf [file viruses-10-00658-s001.pdf]

Supplementary:

**Table S1.** Laboratory parameter observations by day.

| Parameter  | Variant | Day post-exposure* |    |    |   |    |    |    |    |   |    |    |    |
|------------|---------|--------------------|----|----|---|----|----|----|----|---|----|----|----|
|            |         | 0                  | 1  | 3  | 4 | 5  | 6  | 7  | 8  | 9 | 10 | 11 | 13 |
| ALT        | Angola  | 18                 | 0  | 11 | 6 | 6  | 17 | 10 | 13 | 8 | 8  | 0  | 0  |
|            | Musoke  | 29                 | 6  | 17 | 6 | 23 | 0  | 0  | 17 | 7 | 12 | 2  | 0  |
| aPTT       | Angola  | 10                 | 0  | 3  | 0 | 5  | 9  | 1  | 5  | 0 | 0  | 0  | 0  |
|            | Musoke  | 24                 | 6  | 17 | 0 | 29 | 0  | 0  | 17 | 4 | 8  | 1  | 1  |
| AST        | Angola  | 18                 | 0  | 11 | 6 | 6  | 17 | 10 | 13 | 7 | 8  | 0  | 0  |
|            | Musoke  | 29                 | 6  | 17 | 6 | 23 | 0  | 0  | 17 | 7 | 11 | 1  | 0  |
| BUN        | Angola  | 18                 | 0  | 11 | 6 | 6  | 17 | 10 | 13 | 8 | 8  | 8  | 0  |
|            | Musoke  | 29                 | 6  | 17 | 6 | 23 | 3  | 0  | 17 | 7 | 16 | 3  | 1  |
| Creatinine | Angola  | 18                 | 0  | 11 | 6 | 6  | 17 | 10 | 13 | 8 | 8  | 8  | 0  |
|            | Musoke  | 29                 | 6  | 17 | 6 | 23 | 0  | 0  | 17 | 5 | 11 | 2  | 1  |
| CRP        | Angola  | 10                 | 0  | 3  | 6 | 6  | 9  | 2  | 5  | 0 | 0  | 0  | 0  |
|            | Musoke  | 29                 | 6  | 17 | 6 | 22 | 0  | 0  | 16 | 5 | 14 | 3  | 1  |
| Fibrinogen | Angola  | 10                 | 0  | 3  | 0 | 5  | 9  | 1  | 5  | 0 | 0  | 0  | 0  |
|            | Musoke  | 24                 | 6  | 17 | 6 | 23 | 0  | 0  | 15 | 4 | 6  | 1  | 0  |
| Hgb        | Angola  | 18                 | 0  | 11 | 6 | 6  | 17 | 10 | 13 | 8 | 8  | 8  | 0  |
|            | Musoke  | 29                 | 11 | 17 | 6 | 17 | 0  | 0  | 17 | 6 | 14 | 4  | 1  |
| Platelets  | Angola  | 18                 | 0  | 11 | 6 | 6  | 17 | 10 | 14 | 8 | 8  | 8  | 0  |
|            | Musoke  | 29                 | 11 | 17 | 6 | 17 | 0  | 0  | 17 | 7 | 15 | 4  | 1  |
| PT         | Angola  | 10                 | 0  | 3  | 0 | 5  | 9  | 1  | 3  | 0 | 0  | 0  | 0  |
|            | Musoke  | 24                 | 6  | 17 | 6 | 23 | 0  | 0  | 17 | 4 | 5  | 1  | 1  |
| Viral load | Angola  | 10                 | 0  | 11 | 6 | 6  | 18 | 9  | 8  | 2 | 0  | 0  | 0  |
|            | Musoke  | 23                 | 0  | 17 | 6 | 11 | 6  | 0  | 17 | 5 | 13 | 3  | 1  |
| WBC        | Angola  | 18                 | 0  | 11 | 6 | 6  | 17 | 11 | 13 | 8 | 8  | 8  | 0  |
|            | Musoke  | 29                 | 11 | 17 | 6 | 17 | 0  | 0  | 17 | 7 | 15 | 4  | 1  |

ALT, alanine transaminase; AST, aspartate transaminase; aPTT, activated partial thromboplastin time; CRP, C-reactive protein; Hgb, hemoglobin; PT, prothrombin time; WBC, white blood count. \*There were no observations on 2 and 12 days post-exposure.

**Table S2.** Endpoints for elevation or decrease of different laboratory parameters. For decreasing parameters, endpoints were the lower limit of the confidence interval. Due to right skewed data, endpoints were defined as two times the upper limit of the confidence interval for increasing parameters.

| Parameter                           | Male | Female | Abbreviation | Reference |
|-------------------------------------|------|--------|--------------|-----------|
| <b>Immune activation</b>            |      |        |              |           |
| 1. Hemoglobin (mg/dL)               | 12.7 | 10.7   | ≤ LLN        | [31]      |
| 2. CRP (mg/L)                       | 3.7  | 3.5    | ≥ 2x ULN     | [32]      |
| 3. WBC (x10 <sup>3</sup> /μl)       | 21.6 | 26.2   | ≥ 2x ULN     | [31]      |
| <b>Organ dysfunction</b>            |      |        |              |           |
| 4. ALT (U/L)                        | NA   | 190    | ≥ 2x ULN     | [31]      |
| 5. AST (U/L)                        | NA   | 116    | ≥ 2x ULN     | [31]      |
| 6. Creatinine (mg/dL)               | NA   | 2      | ≥ 2x ULN     | [31]      |
| <b>Coagulopathy</b>                 |      |        |              |           |
| 7. Fibrinogen (mg/dL)               | 100  | 100    | ≤ LLN        | [31]      |
| 8. Platelets (x10 <sup>6</sup> /μl) | 330  | 221    | ≤ LLN        | [31]      |
| 9. aPTT (s)                         | 39.1 | 39.9   | ≥ 2x ULN     | [32]      |
| 10. PT (s)                          | 19.9 | 19.7   | ≥ 2x ULN     | [32]      |

ALT, alanine transaminase; AST, aspartate transaminase; aPTT, activated partial thromboplastin time; CRP, C-reactive protein; Hgb, hemoglobin; PT, prothrombin time; WBC, white blood count; NA, not available; LLN, Lower limit of normal for each sex; ULN, Upper limit of normal for each sex.
